# Supplementary material
Source: PubMed Central journal article supplement (PMC2686666)

## ELECTRONIC SUPPLEMENTARY MATERIAL 2 (page 1)

Cladistic analysis. Twenty-nine characters were selected in 14 species of Cambrian 'great appendage' (megacheiran) arthropods, including *Isoxys*, *Naraoia spinosa* Zhang & Hou and *Canadaspis perfecta* (Walcott) were chosen as outgroup arthropods for rooting. Characters include major features of the exoskeleton, body segments, appendage structure and organs (page 3 of this file). The data matrix (page 2 of this file) was analyzed using the heuristic search option of the parsimony program PAUP 4.0b10 (Swofford 2002). All characters are considered unordered and equally weighed. Invalid characters were considered as unknown states and were treated as unknown values. 'X' = reductive coding denoting inapplicable character. Cladogram (page 4 of this file) showing the possible relationships of *Isoxys* to other megacheiran arthropods. Strict consensus of one tree. Length= 86; Consistency Index (CI)= 0.56; Homoplasy Index (HI)= 0.44; Retention Index (RI)= 0.65; Rescaled Consistency Index (RC)= 0.3618.

### Sources :

- Briggs, D. E. G. & Collins, D. 1999 The arthropod *Alalcomenaeus cambricus* Simonetta, from the Middle Cambrian Burgess Shale of British Columbia. *Palaeontology* **42**, 953-977.
- Briggs, D. E. G. & Robison, R. A. 1984 Exceptionally preserved nontrilobite arthropods and Anomalocaris from the Middle Cambrian of Utah. *University of Kansas Paleontological Contributions* **111**.
- Briggs, D. E. G. 1978 The Morphology, mode of life, and affinities of *Canadaspis perfecta* (Crustacea: Phyllocarida), Middle Cambrian, Burgess Shale, British Columbia. *Philosophical Transactions of the Royal Society of London. Series B, Biological Sciences* **281**, 439-487.
- Briggs, D. E. G. 1994 Giant predators from the Cambrian of China. *Science* **264**, 1283-1284.
- Briggs, D. E. G., Erwin, D. H. & Collier, F. J. 1994 *The Fossils of the Burgess Shale*. Washington D.C.: Smithsonian Institution Press.
- Bruton, D. L. & Whittington, H. B. 1983 *Emeraldella* and *Leaichoilia*, two arthropods from the Burgess Shale, British Columbia. *Philosophical Transactions of the Royal Society of London Series B* **300**, 553-585.
- Budd, G. E. 2002 A palaeontological solution to the arthropod head problem. *Nature* **417**, 271-275.
- Chen, J.-Y. & Zhou, G.-Q. 1997 Biology of the Chengjiang fauna. *Bulletin of the National Museum of Natural Sciences* **10**, 11-105.
- Chen, J.-Y. 2004 *The Dawn of Animal World*. Nanjing: Jiangsu Science and Technology Press.
- Chen, J.-Y., Ramsköld, L. & Zhou, G.-Q. 1994 Evidence for monophyly and arthropod affinity of Cambrian giant predators. *Science* **264**, 1304-1308.
- Chen, J.-Y., Waloszek, D. & Maas, A. 2004 A new "great-appendage" arthropod from the Lower Cambrian of China and homology of chelicerate chelicerae and raptorial antero-ventral appendages. *Lethaia* **37**, 3-20.
- Garcia-Bellido, D. 2007 Reassessment of the genus *Leaichoilia* (Arthropoda, Arachnomorpha) from the Middle Cambrian Burgess Shale, British Columbia, Canada. *Palaeontology* **50**, 693-709.
- Hou, X.-G. & Bergström, J. 1997 Arthropods of the Lower Cambrian Chengjiang fauna, southwest China. *Fossils & Strata* **45**, 1-116.
- Hou, X.-G. 1987 Two new arthropods from the Lower Cambrian, Chengjiang, eastern Yunnan. *Acta Palaeontologica Sinica* **26**, 236-256.
- Hou, X.-G. 1999 New rare bivalved arthropods from the Lower Cambrian Chengjiang fauna, Yunnan, China. *Journal of Paleontology* **73**, 102-116.
- Hou, X.-G., Aldridge, R. J., Bergström, J., Siveter, D. J., Siveter, D. J. & Feng, X.-H. 2004 *The Cambrian Fossils of Chengjiang, China*. Oxford: Blackwell.
- Hou, X.-G., Bergström, J. & Ahlberg, P. 1995 *Anomalocaris* and other large animals in the Lower Cambrian Chengjiang fauna of southwest China. *Geologiska Föreningens i Stockholm Förhandlingar* **117**, 163-183.
- Hou, X.-G., Bergström, J., Wang, H.-F., Feng, X.-H. & Chen, A.-L. 1999 *The Chengjiang fauna. Exceptionally well-preserved animals from 530 million years ago*. Kunming: Yunnan Science and Technology Press.
- Luo, H.-L., Hu, S.-X., Chen, L.-Z., Zhang, S.-S. & Tao, Y.-H. 1999 *Early Cambrian Chengjiang fauna from Kunming region, China*. Kunming: Yunnan Science and Technology Press.
- Simonetta, A. M. 1970 Studies on non-trilobite arthropods of the Burgess Shale (Middle Cambrian). *Palaeontographica Italica* **66**, 35-45.
- Swofford, D. L. 2002 *PAUP\*: Phylogenetic analysis using parsimony (\*and other methods); Version 4.0b2a*. Sunderland MA: Sinauer Associates.
- Vannier, J. & Chen, J.-Y. 2000 The Early Cambrian colonization of pelagic niches exemplified by *Isoxys* (Arthropoda). *Lethaia* **33**, 295-311.
- Walcott, C. D. 1912 Cambrian Geology and Paleontology II No.6- Middle Cambrian Branchiopoda, Malacostraca, Trilobita, and
- Whittington, H. B. 1974 *Yohoia* Walcott and *Plenocaris* n. gen., arthropods from the Burgess Shale, British Columbia. *Geological Survey of Canada Bulletin* **231**, 1-21.
- Williams, M., Siveter, D. J. & Peel, J. S. 1996 *Isoxys* (Arthropoda) from the Early Cambrian Sirius Passet Lagerstätte, North Greenland. *Journal of Paleontology* **70**, 947-954.
- Zhang, W. & Hou, X.-G. 1985 Preliminary notes on the occurrence of unusual trilobite *Naraoia* in Asia. *Acta Palaeontologica Sinica* **24**, 591-595.
- Zhang, X.-L., Shu, D.-G. & Erwin, D. H. 2007 Cambrian naraoiids (Arthropoda): morphology, ontogeny, systematics, and evolutionary relationships. *Journal of Paleontology, Memoir* **68**, 1-52.

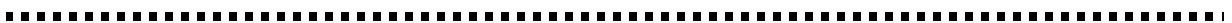

TAXA

CHARACTERS

|                                                               | 1        | 2        | 3        | 4        | 5        | 6        | 7        | 8        | 9        | 10       | 11       | 12       | 13       | 14       | 15       | 16       | 17       | 18       | 19       | 20       | 21       | 22       | 23       | 24       | 25       | 26       | 27       | 28       | 29       |
|---------------------------------------------------------------|----------|----------|----------|----------|----------|----------|----------|----------|----------|----------|----------|----------|----------|----------|----------|----------|----------|----------|----------|----------|----------|----------|----------|----------|----------|----------|----------|----------|----------|
| <i>Naraoia spinosa</i> Zhang and Hou, 1985                    | 3        | 1        | 1        | 0        | 1        | 3        | 2        | X        | X        | X        | X        | X        | X        | X        | 2        | 0        | 0        | 0        | 1        | 0        | 0        | 1        | 1        | 1        | 0        | 0        | 3        | 1        | 0        |
| <i>Canadaspis perfecta</i> (Walcott, 1912)                    | 3        | 2        | 0        | X        | 2        | 3        | 0        | X        | X        | X        | X        | X        | X        | X        | 0        | 2        | X        | X        | X        | 0        | 0        | 1        | 1        | 0        | 0        | 1        | X        | 1        | X        |
| <i>Alacomeneus cambricus</i> Simonetta, 1970                  | 1        | 2        | 1        | 0        | 0        | 2        | 1        | 3        | 2        | 1        | 2        | 2        | 2        | 0        | 0        | 0        | 1        | 0        | 0        | 1        | 0        | 1        | 1        | 0        | 0        | 1        | 1        | 1        | 0        |
| <i>Alacomeneus illecebrosus</i> Hou, 1987                     | 2        | 1        | 1        | 0        | 0        | 2        | 1        | 3        | 2        | 1        | 2        | 2        | 2        | 0        | 0        | 0        | 1        | 0        | 0        | 2        | 0        | ?        | 1        | 0        | 0        | 1        | ?        | 1        | 0        |
| <i>Anomalocaris saron</i> Hou et al. 1995                     | 1        | 1        | 1        | 0        | 0        | ?        | ?        | 2        | 1        | 3        | 3        | 1        | 1        | 1        | 0        | 1        | 1        | 0        | 0        | 1        | 0        | ?        | 0        | ?        | 1        | 0        | 2        | 1        | 1        |
| <i>Forfexicaris valida</i> Hou, 1999                          | ?        | 2        | 1        | 1        | 1        | 3        | 3        | 1        | 2        | 1        | 3        | 1        | 1        | 1        | ?        | ?        | ?        | ?        | 0        | ?        | ?        | ?        | 0        | ?        | 0        | 1        | ?        | 0        | 1        |
| <i>Fortiforceps foliosa</i> Hou and Bergström, 1997           | 2        | 0        | 1        | 0        | 0        | 0        | 0        | 3        | 1        | 2        | 3        | 2        | 2        | 2        | 2        | 0        | 1        | 1        | 0        | 0        | ?        | ?        | 1        | 1        | 0        | 1        | 1        | 1        | 1        |
| <i>Haikoucaris ercaiensis</i> Chen et al. 2004                | 2        | 1        | 1        | 0        | 0        | 1        | 0        | 3        | 1        | 1        | 3        | 1        | 1        | 0        | 1        | 0        | 1        | 0        | 0        | 1        | 0        | 0        | 1        | 0        | 0        | 1        | ?        | 1        | 0        |
| <b><i>Isoxys acutangulus</i> (Walcott, 1908)</b>              | <b>?</b> | <b>1</b> | <b>1</b> | <b>2</b> | <b>1</b> | <b>3</b> | <b>3</b> | <b>1</b> | <b>2</b> | <b>2</b> | <b>3</b> | <b>1</b> | <b>1</b> | <b>1</b> | <b>1</b> | <b>0</b> | <b>1</b> | <b>0</b> | <b>0</b> | <b>1</b> | <b>0</b> | <b>?</b> | <b>0</b> | <b>?</b> | <b>0</b> | <b>1</b> | <b>1</b> | <b>0</b> | <b>1</b> |
| <i>Jianfengia multisegmentalis</i> Hou, 1987                  | 2        | 0        | 1        | 0        | 0        | 0        | 0        | 3        | 1        | 2        | 3        | 1        | 1        | 0        | 2        | 0        | 1        | 0        | 0        | 1        | 1        | ?        | 1        | 0        | 0        | 1        | 0        | 1        | ?        |
| <i>Leanchoilia persephone</i> Simonetta, 1970                 | 2        | 2        | 2        | 0        | 0        | 2        | 2        | 3        | 2        | 0        | 2        | 2        | 2        | 0        | 0        | 0        | 0        | 1        | 0        | 2        | 0        | 0        | 2        | 1        | 0        | 1        | 1        | 1        | 0        |
| <i>Leanchoilia superlata</i> Walcott, 1912                    | 2        | 2        | 2        | 0        | 0        | 3        | 2        | 3        | 2        | 0        | 2        | 2        | 2        | 0        | 0        | 0        | 0        | 1        | 0        | 2        | 0        | 0        | 2        | 1        | 0        | 1        | 1        | 1        | 0        |
| <i>Occacaris oviformis</i> Hou, 1999                          | 2        | 2        | 1        | 1        | 1        | 3        | 3        | 1        | 2        | 1        | 3        | 1        | 1        | 1        | 1        | ?        | ?        | ?        | 1        | ?        | ?        | ?        | 0        | 1        | ?        | ?        | 1        | 0        | 1        |
| <i>Parapeytoia yunnanensis</i> Hou et al., 1995               | 1        | 2        | ?        | x        | 0        | ?        | ?        | 2        | 2        | 1        | 3        | 2        | 2        | 2        | 2        | 1        | 1        | 0        | 0        | 1        | 0        | ?        | 0        | 1        | 1        | 0        | 2        | 0        | ?        |
| <i>Tanglangia longicaudata</i> Luo and Hu in Luo et al., 1999 | 2        | 1        | 1        | 0        | 0        | 1        | 0        | 3        | 1        | 1        | 3        | 1        | 1        | 1        | 1        | 0        | 0        | 1        | 0        | 0        | 1        | ?        | 1        | ?        | 0        | 1        | 0        | 1        | 0        |
| <i>Yohoa tenuis</i> Walcott, 1912                             | 2        | 1        | ?        | X        | 0        | 1        | 1        | 3        | 1        | 1        | 3        | 2        | 2        | 2        | 0        | 0        | 0        | 1        | 1        | 0        | 0        | ?        | 0        | ?        | 0        | 1        | 1        | 1        | ?        |

outgroups

| n° charact. | CHARACTERS                                       | 0                                 | 1                                  | 2                             | 3                | ?                 | x            |
|-------------|--------------------------------------------------|-----------------------------------|------------------------------------|-------------------------------|------------------|-------------------|--------------|
| 1           | Number of cephalic appendages                    | 2 pairs                           | 3 pairs                            | 4 pairs                       | 5 pairs          | unknown/uncertain | inapplicable |
| 2           | Length of head (% of body length (BL))           | between 0 and 10%                 | between 10 and 20%                 | over 20%                      |                  | unknown/uncertain | inapplicable |
| 3           | Eyes                                             | absent                            | 1 pair                             | two pairs                     |                  | unknown/uncertain | inapplicable |
| 4           | Diameter of eyes (% of BL)                       | between 0 and 5%                  | between 5 and 10%                  | over 10%                      |                  | unknown/uncertain | inapplicable |
| 5           | Headshield                                       | folded, no extensions             | folded with extensions             | not folded, flattened         |                  | unknown/uncertain | inapplicable |
| 6           | Length of head shield (% of BL)                  | between 0 and 10%                 | between 10 and 20%                 | between 20 and 30%            | over 30%         | unknown/uncertain | inapplicable |
| 7           | Height of head shield (% of BL)                  | between 0 and 10%                 | between 10 and 20%                 | between 20 and 30%            | over 30%         | unknown/uncertain | inapplicable |
| 8           | Great appendage (GA)                             | straight                          | curved anteriorly                  | curved posteriorly            | bent at an angle | unknown/uncertain | inapplicable |
| 9           | Length of GA (% of BL)                           | between 0 and 10%                 | between 10 and 30%                 | over 30%                      |                  | unknown/uncertain | inapplicable |
| 10          | Number of articles of GA (excluding peduncle)    | 3                                 | 4                                  | multiple                      |                  | unknown/uncertain | inapplicable |
| 11          | distalmost (1st) article of GA                   | cylindrical, smooth               | with short spine                   | with long spine/flagellum     | claw-like        | unknown/uncertain | inapplicable |
| 12          | 2nd distal article of GA                         | cylindrical, smooth               | with short spine                   | with long spine/flagellum     | claw-like        | unknown/uncertain | inapplicable |
| 13          | 3rd distal article of GA                         | cylindrical, smooth               | with short spine                   | with long spine/flagellum     | claw-like        | unknown/uncertain | inapplicable |
| 14          | 4th distal article of GA                         | cylindrical, smooth               | with short spine                   | with long spine/flagellum     | claw-like        | unknown/uncertain | inapplicable |
| 15          | Number of trunk segments bearing appendages      | 10 or 11                          | 12 or 13                           | 14 or more                    |                  | unknown/uncertain | inapplicable |
| 16          | Shape of trunk tergites                          | inverted U-shaped                 | flattened                          | fused (e.g. posterior shield) |                  | unknown/uncertain | inapplicable |
| 17          | Length of trunk tergites                         | almost constant                   | decreasing posteriorly             |                               |                  | unknown/uncertain | inapplicable |
| 18          | Tergopleurae                                     | absent                            | present (wing-like)                |                               |                  | unknown/uncertain | inapplicable |
| 19          | Telescopic tube-like trunk segments              | absent                            | present                            |                               |                  | unknown/uncertain | inapplicable |
| 20          | Maximum length of trunk appendages (% of BL)     | below 20%                         | between 20 and 30%                 | over 30%                      |                  | unknown/uncertain | inapplicable |
| 21          | Longest trunk appendage                          | between 1st and 5th trunk segment | beyond 5th segment                 |                               |                  | unknown/uncertain | inapplicable |
| 22          | Basipod of trunk appendages                      | smooth stem                       | stem with outgrowths (endites)     |                               |                  | unknown/uncertain | inapplicable |
| 23          | Endopod of trunk appendages                      | shorter than exopod               | longer than exopod                 | same length as exopod         |                  | unknown/uncertain | inapplicable |
| 24          | Number of articles of endopod (trunk appendages) | between 5 and 7                   | over 7                             |                               |                  | unknown/uncertain | inapplicable |
| 25          | Exopod of trunk appendages                       | leaf/paddle-shaped                | large striped flaps                |                               |                  | unknown/uncertain | inapplicable |
| 26          | Marginal features of exopod (trunk appendages)   | absent                            | setae/filaments/lamellae           |                               |                  | unknown/uncertain | inapplicable |
| 27          | Telson                                           | spine-like, no flaps              | spatulate (lateral flaps or setae) | with long trailing spines     |                  | unknown/uncertain | inapplicable |
| 28          | Crawling capabilities                            | no                                | yes                                |                               |                  | unknown/uncertain | inapplicable |
| 29          | Vision                                           | ventral and frontal               | panoramic                          |                               |                  | unknown/uncertain | inapplicable |

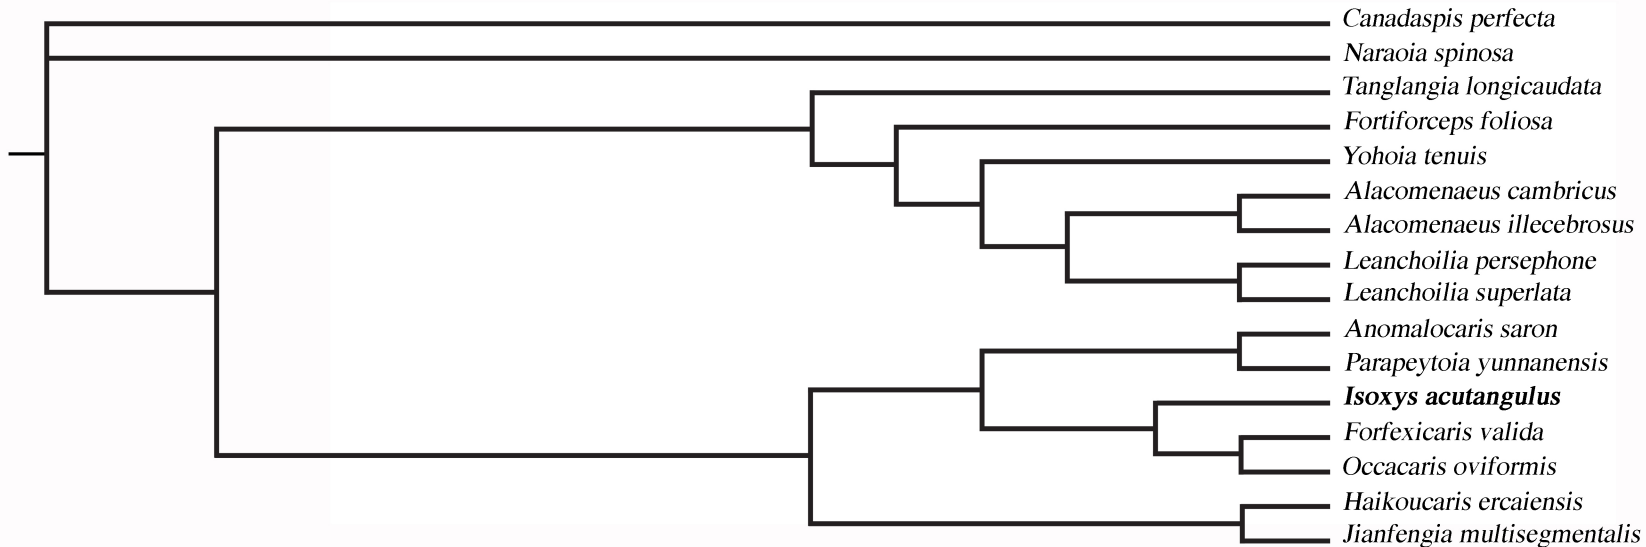

Supplement: rspb20090361s10.pdf [file rspb20090361s10.pdf]
