# Supplementary material
Source: PubMed Central journal article supplement (PMC2686666)
Supplement: rspb20090361s09.pdf [file rspb20090361s09.pdf]

## ELECTRONIC SUPPLEMENTARY MATERIAL 1

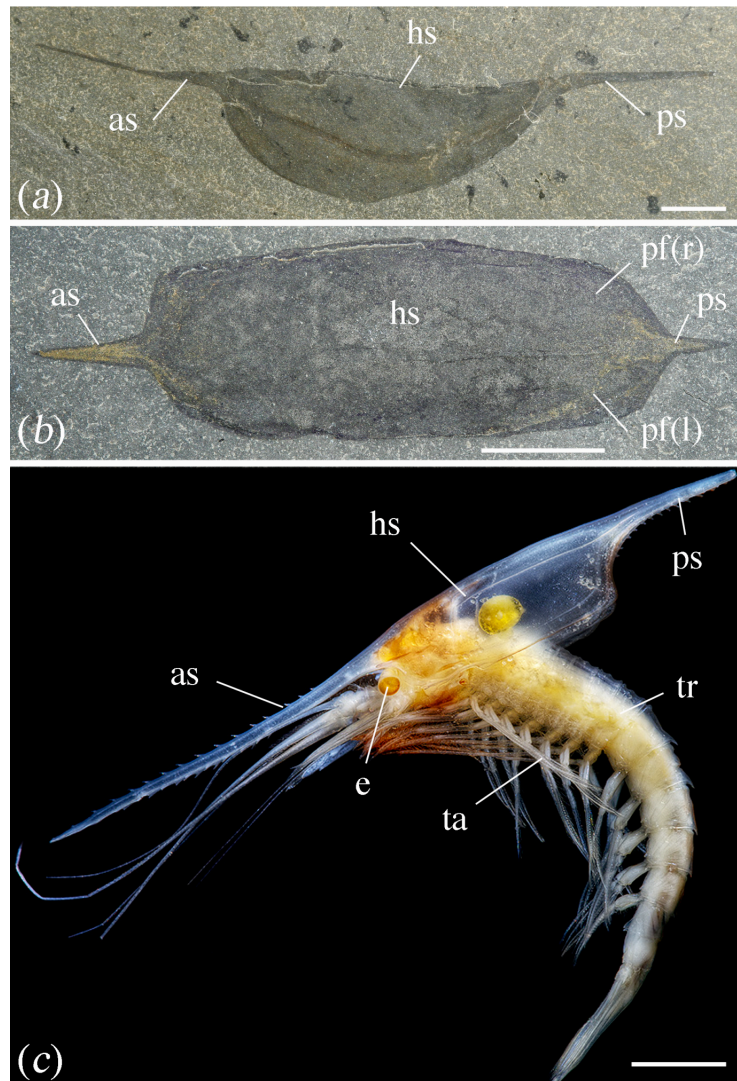

Head shield in *Isoxys* and Recent pelagic lophogastrid crustacean. (a) *Isoxys longissimus* Simonetta & Delle Cave from the Middle Cambrian Burgess Shale Formation, British Columbia, Canada, left lateral view (ROM 57910). (b) *Isoxys acutangulus* (Walcott) from the Middle Cambrian Burgess Shale Formation, British Columbia, Canada, dorsoventrally compressed specimen (ROM 57902). (c) *Gnathophausia zoea* Willemoes-Suhm (Malacostraca, Lophogastrida), from <http://en.wikipedia.org/wiki/Crustacean>. Scale bar 5 mm.

as, anterior spine; e, eye; hs, head shield; l, left; pf, pleural fold; ps, posterior spine; r, right; ta, trunk appendage; tr, trunk.
